# Supplementary material for: Neuromorphic Computing of Optoelectronic Artificial BFCO/AZO Heterostructure Memristors Synapses
Source: MDPI journal article supplement (doi:10.3390/nano14070583), 2024-03-27
Supplement: s1 [file s1]

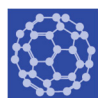

# Neuromorphic Computing of Optoelectronic Artificial BFCO/AZO Heterostructure Memristors Synapses

Zhao-Yuan Fan <sup>1</sup>, Zhenhua Tang <sup>1,\*</sup>, Jun-Lin Fang <sup>1</sup>, Yan-Ping Jiang <sup>1</sup>, Qiu-Xiang Liu <sup>1</sup>, Xin-Gui Tang <sup>1</sup>, Yi-Chun Zhou <sup>2</sup> and Ju Gao <sup>3</sup>

<sup>1</sup> School of Physics and Optoelectric Engineering, Guangdong University of Technology, Guangzhou Higher Education Mega Center, Guangzhou 510006, China; 2112115054@mail2.gdut.edu.cn (Z.-Y.F.)

<sup>2</sup> School of Advanced Materials and Nanotechnology, Xidian University, Xi'an 710126, China

<sup>3</sup> Department of Physics, The University of Hong Kong, Hong Kong 999077, China

\* Correspondence: tangzh@gdut.edu.cn

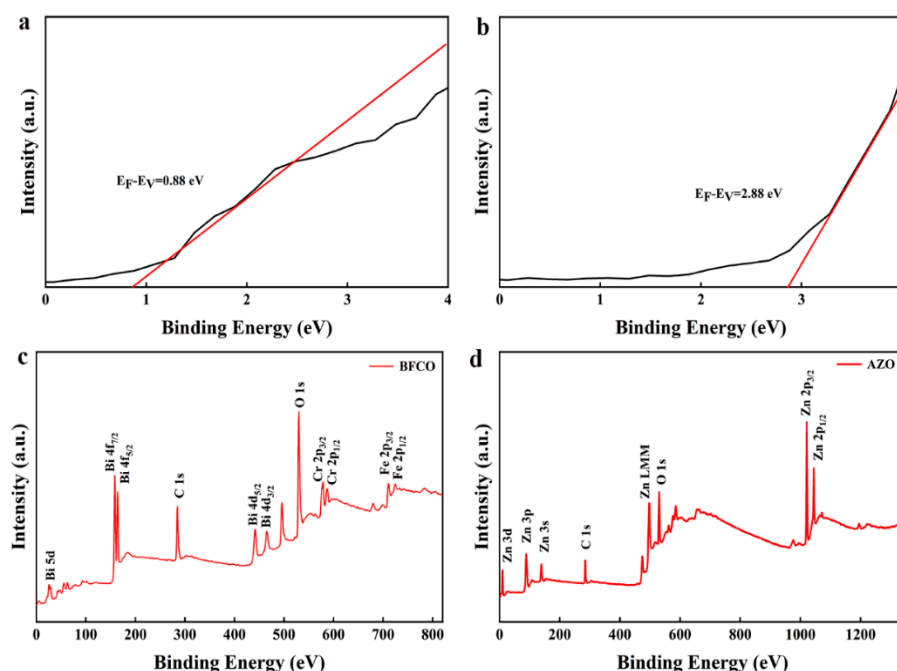

**Figure S1.** (a) XPS valence band spectra of BFCO film. (b) XPS valence band spectra of AZO film. (c) XPS analysis of BFCO film. (d) XPS analysis of AZO film.
